# Supplementary material
Source: publisher figshare collection journal article supplement (https://acs.figshare.com/ndownloader/files/3975241)
Supplement: Supplementary file 1 [file 3975241]

## **Supporting Information**

### **An FCS Study of the Structural Stability of Lysozyme in the Presence of Morpholinium Salts**

**Ashok Pabbathi, Shalini Ghosh and Anunay Samanta\***

#### **Contents:**

**Fig. S1** Correlation curve of free Alexa488 in phosphate buffer solution (pH 7.4) along with the fit to the simple diffusion model.

**Fig S2:** Fluorescence spectra of A488 and Lysz-A488 in buffer (pH 7.4). The concentration of A488 is 0.85  $\mu$ M in both cases.

**Fig S3:** Fluorescence spectra of Lysz-A488 in buffer (pH 7.4) and in the presence of 6M GdnHCl

**Fig S4:** Fluorescence spectra of A488 in buffer (pH 7.4) and in the presence of 6 M GdnHCl

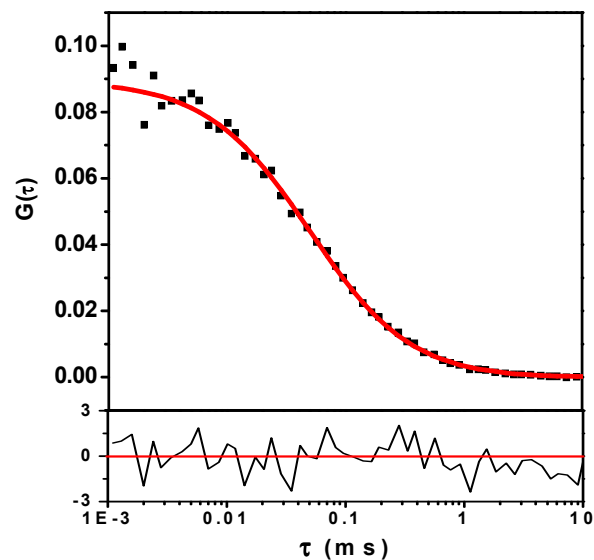

**Fig. S1** Correlation curve of free Alexa488 in phosphate buffer solution (pH 7.4) along with the fit to the simple diffusion model.

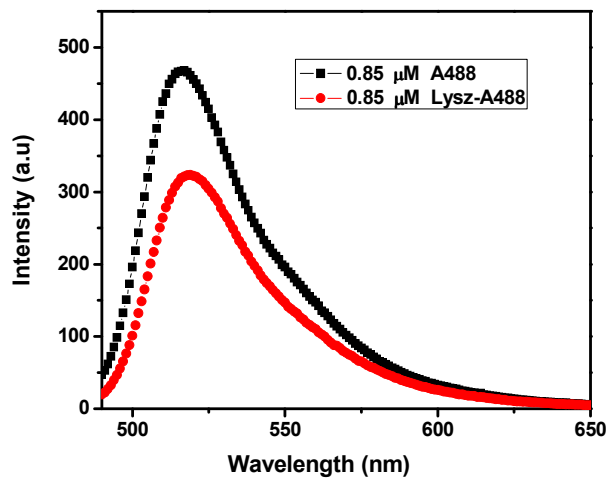

**Fig S2:** Fluorescence spectra of A488 and Lysz-A488 in buffer (pH 7.4). The concentration of A488 is 0.85  $\mu\text{M}$  in both cases.

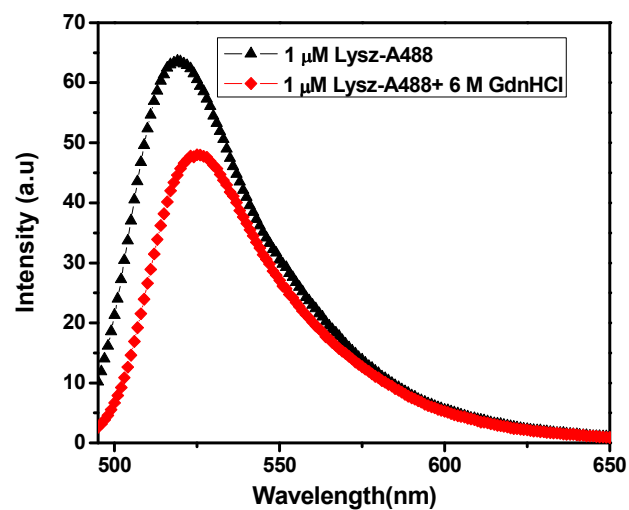

**Fig S3:** Fluorescence spectra of Lysz-A488 in buffer (pH 7.4) and in the presence of 6M GdnHCl

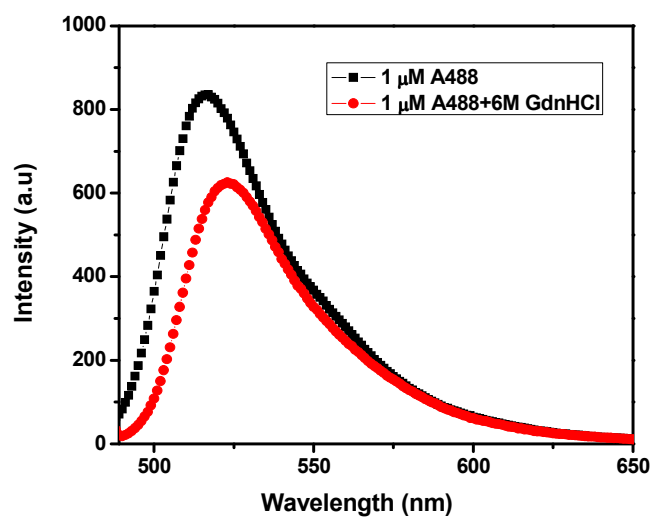

**Fig S4:** Fluorescence spectra of A488 in buffer (pH 7.4) and in the presence of 6 M GdnHCl
